# Supplementary material for: Genomic Identification of Multidrug-Resistant Salmonella Virchow Monophasic Variant Causing Human Septic Arthritis
Source: MDPI journal article supplement (doi:10.3390/pathogens10050536), 2021-04-29
Supplement: s1 [file s1]

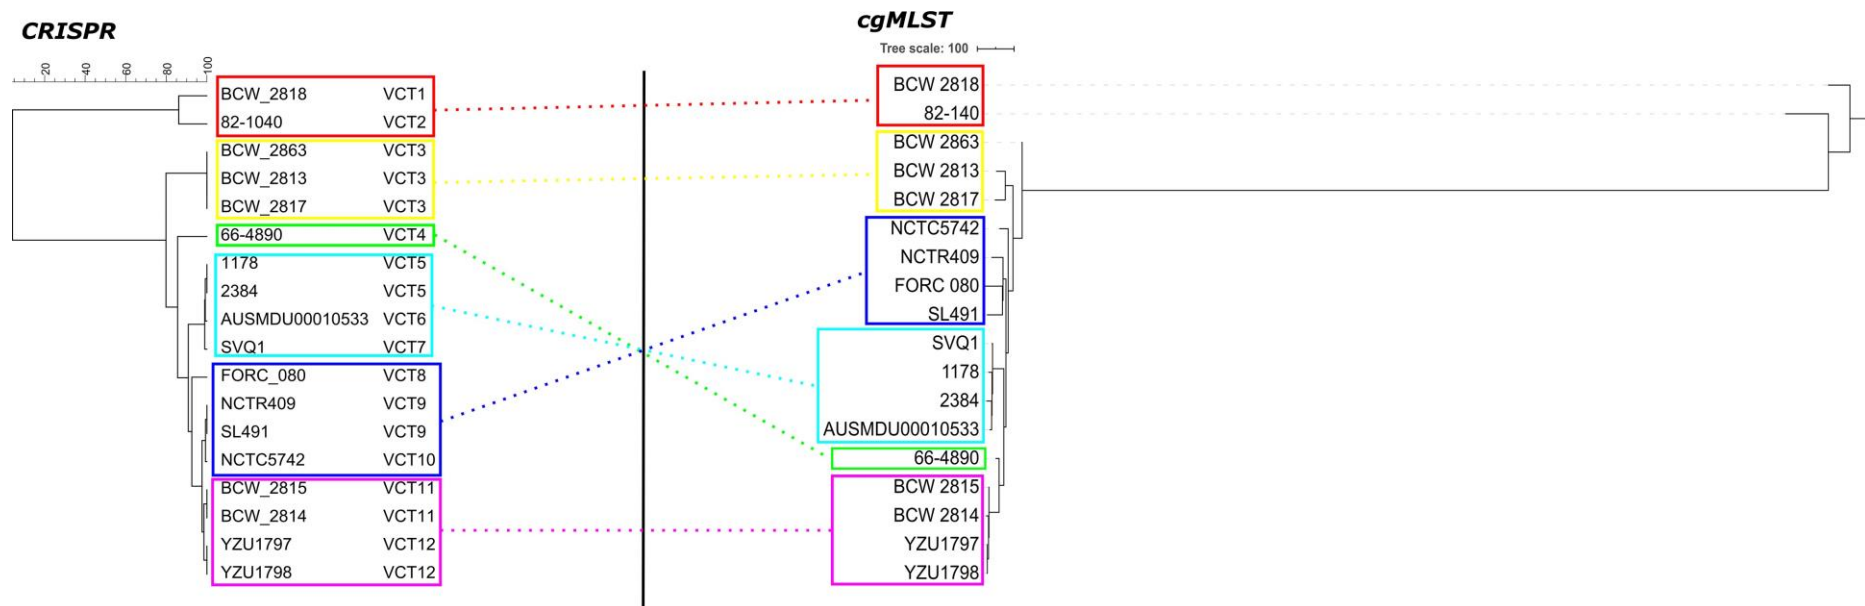

**Supplementary Figure S1:** Comparison of the phylogenetic trees constructed by cgMLST and CRISPR typing of 18 strains. The rectangles with same colors represent the correspondent cluster between cgMLST and CRISPR typing analysis.
